# Supplementary material for: Observation of high-density multi-excitons in medium-size CdSe/CdZnS/ZnS colloidal quantum dots through transient spectroscopy and their optical gain properties
Source: Royal Society of Chemistry journal article supplement (doi:10.1039/d2nr00761d), 2022-01-01
Supplement: d2nr00761d1.pdf [file d2nr00761d1.pdf]

## Supplementary Information for

Observation of High-Density Multi-Excitons in Medium-Size  
CdSe/CdZnS/ZnS Colloidal Quantum Dots through Transient  
Spectroscopy and Their Optical Gain Property

*Hongyu Yang<sup>a</sup>, Si Li<sup>b</sup>, Lei Zhang<sup>a</sup>, Wenbin Xiang<sup>a</sup>, Yi Zhang<sup>\*c</sup>,  
Xiaoyong Wang<sup>\*b</sup>, Min Xiao<sup>b, d</sup>, Yiping Cui<sup>a</sup>, Jiayu Zhang<sup>\*a</sup>*

<sup>a</sup> Advanced Photonic Center, School of Electronic science and Engineering, Southeast University, Nanjing 210096, China

<sup>b</sup> National Laboratory of Solid State Microstructures, College of Engineering and Applied Sciences, and School of Physics, Nanjing University, Nanjing 210093, China

<sup>c</sup> College of Energy and Electrical Engineering, Hohai University, Nanjing, 210098, China

<sup>d</sup> University of Arkansas, Fayetteville, Arkansas 72701, United State

\*E-mail: wxiaoyong@nju.edu.cn, zynjjs@outlook.com, jy Zhang@seu.edu.cn

## Supplementary Note.S1. Biexciton Auger recombination lifetime and quantum yield

The biexciton AR rates and QY was calculated according to the method published by Klimov<sup>1</sup> et al.:

$$\tau_{XX,A}^{-1} = \tau_{XX}^{-1} - \tau_{XX,r}^{-1}$$

Where the radiative lifetime is  $\tau_{XX,r} = \frac{\tau_{X,r}}{4}$  and  $\tau_{X,r} = \frac{\tau_X}{QY_X}$ .

Biexciton QY:  $QY_{XX} = 4\tau_{XX}/\tau_X$

## Supplementary Note.S2. Biexciton spectrum calculation

When the pump power is low enough, the triexciton in the QD ensemble can be neglect, then only biexciton and single-exciton recombination is considered. Let  $f_N(t)$  be the exciton population inside a QDs at delay t, and the recombination of multi-exciton is step-transition<sup>2</sup>, the rate function is:

$$\frac{df_N}{dt} = \gamma_{N+1}f_{N+1} - \gamma_N f_N$$

Considering the initial condition:

$$f_N(t=0) = P(N)$$

$$f_{N+1}(t=\infty) = 0$$

By solving the rate equation, when  $\langle N \rangle$  is small enough, the decay of a single exciton satisfies:

$$f_1 = \left( P(1) - \frac{\gamma_2}{\gamma_2 - \gamma_1} P(2) \right) e^{-\gamma_1 t} + \frac{\gamma_2}{\gamma_2 - \gamma_1} P(2) e^{-\gamma_2 t}$$

where  $\gamma_1, \gamma_2$  are the decay rate of single-exciton and biexciton, respectively, which can be obtained from the decay curves.

Therefore, the ratio of single-exciton PL intensity at  $t_0$  and  $t_1 (t_1 \gg \tau_{xx})$  can be calculated. The biexciton spectra can be obtained by subtracting the single-exciton PL spectra at  $t_0$ .

## Supplementary Note.S3 L-L curve fit with rate function

The microcavity L-L curve was fitted by the traditional coupled rate function<sup>3</sup>:

$$\frac{dN}{dt} = \frac{\eta_{in} P_{in}}{\hbar \omega_{in} V} - \frac{N}{\tau_r} - G(N)P$$

$$\frac{dP}{dt} = G(N)P + \beta \frac{N}{\tau_r} - \frac{P}{\tau_c}$$

where, N is carrier density, P is photon density,  $\eta_{in}$  is the efficiency of pump laser,  $\hbar \omega_{in}$

is the energy of pump photon,  $V$  is the volume of the gain medium,  $\tau_r$  is the spontaneous emission lifetime,  $G(N) = g(N - N_{tr})$  is the linear gain function,  $g = \frac{\beta V}{\tau_r}$  and  $N_{tr}$  is the carrier density when transparency.

**Table S1** Comparison of Trion and Biexciton lifetime.

| QDs Type           | Size(nm) | $\tau_{x+}$ (ns) | $\tau_{x-}$ (ns) | $\tau_{xx}$ (ps) | Ref.         |
|--------------------|----------|------------------|------------------|------------------|--------------|
| CdSe/ZnSe          | 6.14     | 0.26             | -                | 29.6             | [1]          |
| CdSe/CdS           | 5.6      | 0.218            | 1.67             | 83               | [2]          |
| CdSeS/ZnS          | 6        | -                | 0.75             | 140              | [3]          |
| CdSe/CdS/CdZnS     | 5.4      | -                | -                | 140              | [4]          |
| CdSe/CdS           | 5.7      | 0.32             | 0.95             | 150              | [5]          |
| InP/ZnSe/ZnS       | 7.4      | -                | 2.2              | 20               | [6]          |
| CsPbI <sub>3</sub> | 8        | -                | 0.235            | 93               | [7]          |
| CdSe/CdS           | 6        | -                | -                | 120              | [8]          |
| CdSe/CdZnS/ZnS     | 6.4      | 0.74             | 6.1              | 150.8            | This article |

## References

1. G. A. Beane, K. Gong and D. F. Kelley, *Acs Nano*, 2016, **10**, 3755-3765.
2. K. Gong and D. F. Kelley, *J. Phys. Chem. C*, 2015, **119**, 9637-9645.
3. W. Qin, R. A. Shah and P. Guyot-Sionnest, *Acs Nano*, 2012, **6**, 912-918.
4. P. P. Jha and P. Guyot-Sionnest, *Acs Nano*, 2009, **3**, 1011-1015.
5. V. Pavlenko, I. Dobynde, I. Belousov and D. Ozol, *Physica E*, 2020, **115**.
6. T. Kim, Y. H. Won, E. Jang and D. Kim, *Nano Lett*, 2021, **21**, 2111-2116.
7. N. S. Makarov, S. J. Guo, O. Isaienko, W. Y. Liu, I. Robel and V. I. Klimov, *Nano Lett*, 2016, **16**, 2349-2362.
8. C. Liao, R. L. Xu, Y. Q. Xu, C. F. Zhang, M. Xiao, L. Zhang, C. G. Lu, Y. P. Cui and J. Y. Zhang, *Journal of Physical Chemistry Letters*, 2016, **7**, 4968-4976.

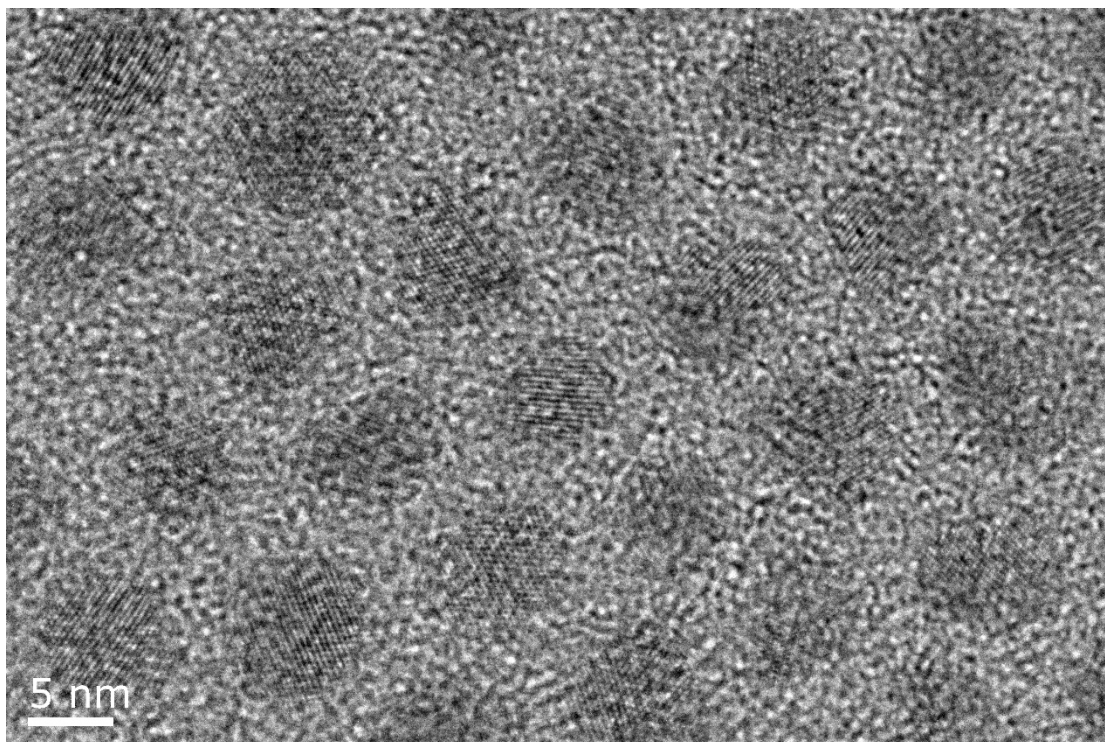

**Fig.S1** HRTEM images of CdSe/CdZnS/ZnS QDs ensembles. Scale bar: 5 nm.

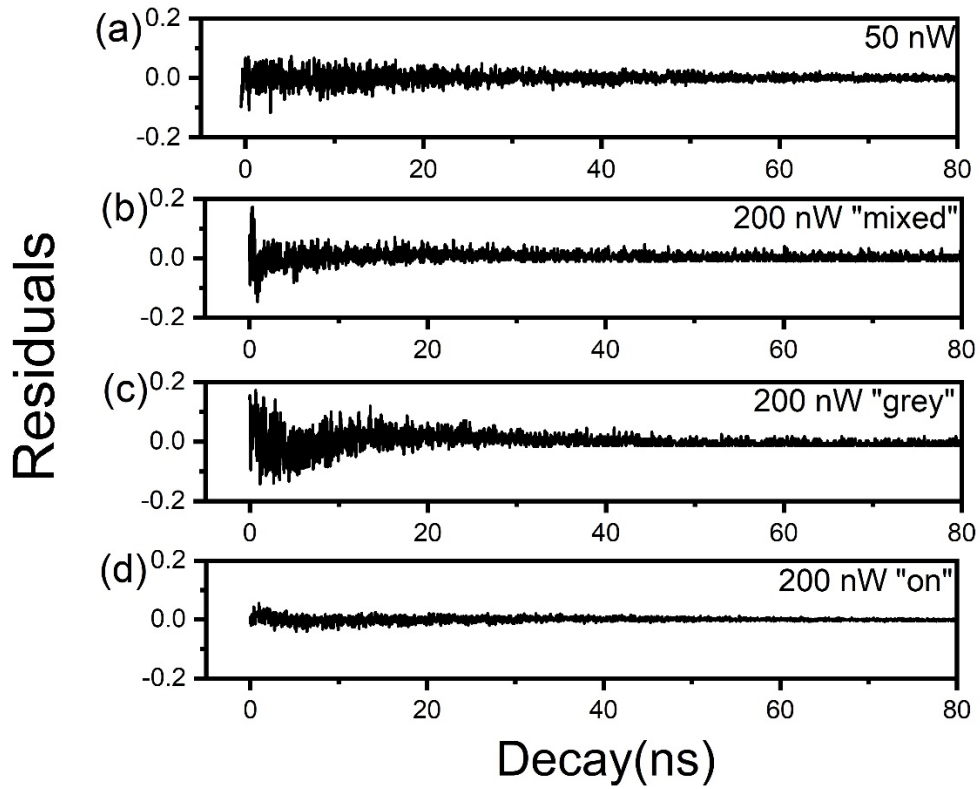

**Fig. S2** (a)-(d) Residuals for the fitting results of the single-dot fluorescence decay.

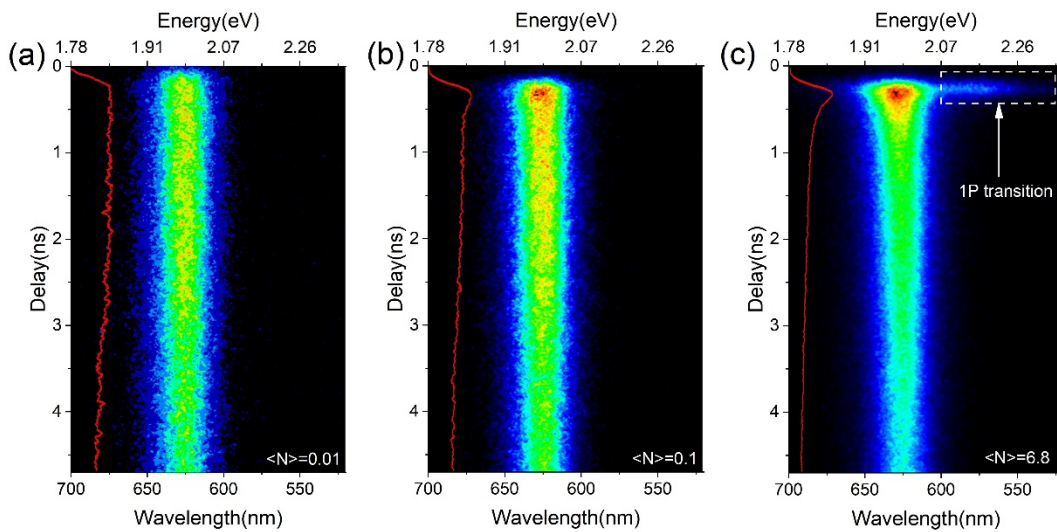

**Fig.S3** (a)-(c) The streak camera image as a function of  $\langle N \rangle$ . The red line corresponds to the interband decay curves.

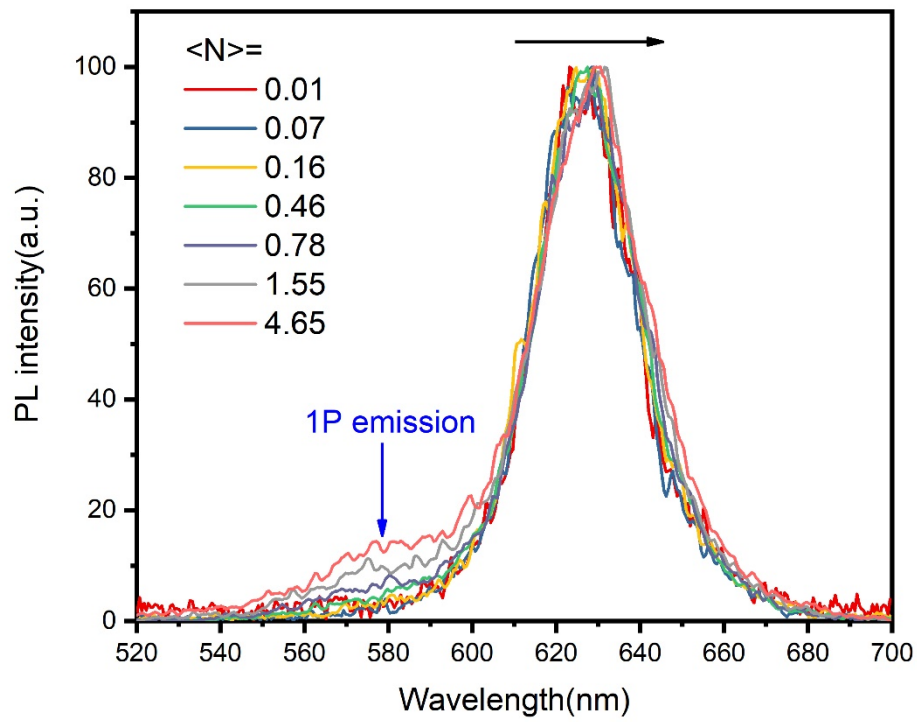

**Fig.S4** The PL spectra vary with  $\langle N \rangle$  obtained from the streak camera image. Integrate window:0-100 ps.

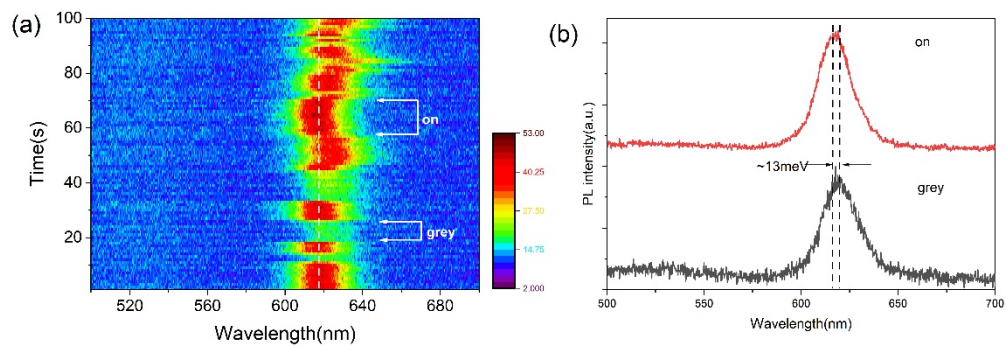

**Fig.S5** (a) Single-dot spectra trace under relatively high pump intensity. The intensity distribution shows long-lived “on” states and short-lived “grey” states. Binning time:1 S. (b) The corresponding “on” and “grey” states spectra. The binning energy of 13 meV was obtained for the negative trion.

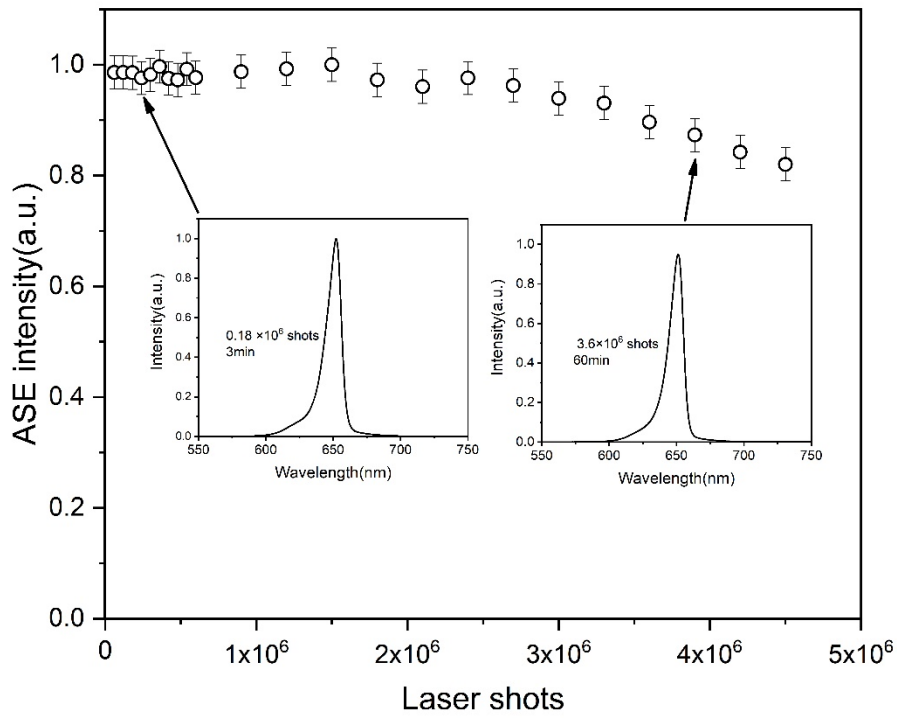

**Fig.S6** Laser-shot-dependent ASE intensity under pump laser shots up to  $5 \times 10^6$  indicating the exceptional stability of the QDs. The inset shows the normalized ASE spectra for  $0.18 \times 10^6$  and  $3.6 \times 10^6$  shots. Pump intensity:  $300 \mu\text{J cm}^{-2}$ .



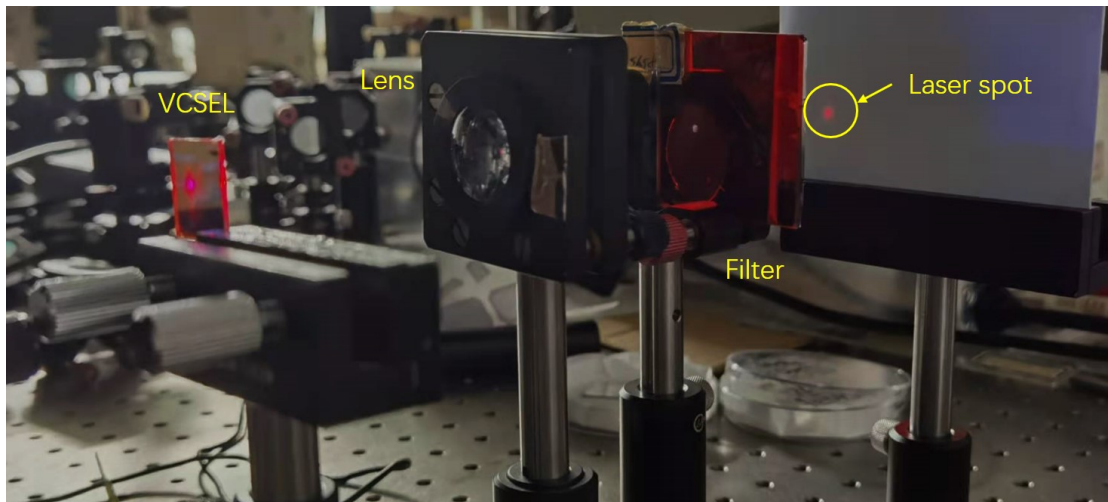

**Fig.S7** Well-defined laser spot of VCSEL when exceeds threshold after the lens and long-pass filter.

## References

1. W. K. Bae, L. A. Padilha, Y. S. Park, H. McDaniel, I. Robel, J. M. Pietryga and V. I. Klimov, *Acs Nano*, 2013, **7**, 3411-3419.
2. V. I. Klimov, A. A. Mikhailovsky, D. W. McBranch, C. A. Leatherdale and M. G. Bawendi, *Science*, 2000, **287**, 1011-1013.
3. G. Bjork and Y. Yamamoto, *Ieee J Quantum Elect*, 1991, **27**, 2386-2396.
